# Supplementary material for: Polycomb preferentially targets stalled promoters of coding and noncoding transcripts
Source: HighWire-hosted journal article supplement (doi:10.1101/gr.114348.110), 2010-12-22
Supplement: Suppl_Figure_4.pdf [file Suppl_Figure_4.pdf]

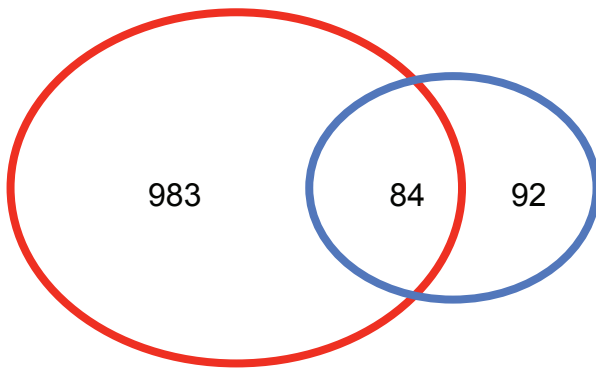

Comparison with Oktaba et al. (2008)

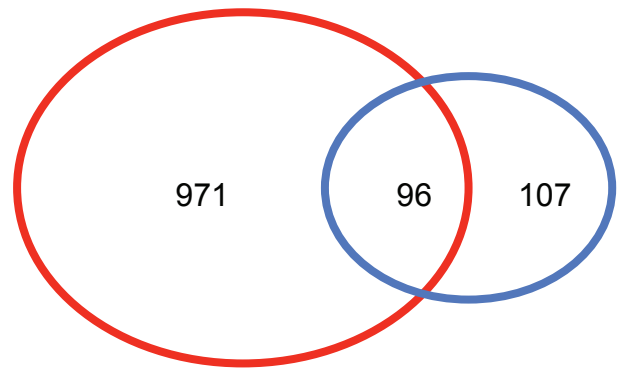

Comparison with Schuettengruber et al. (2009)

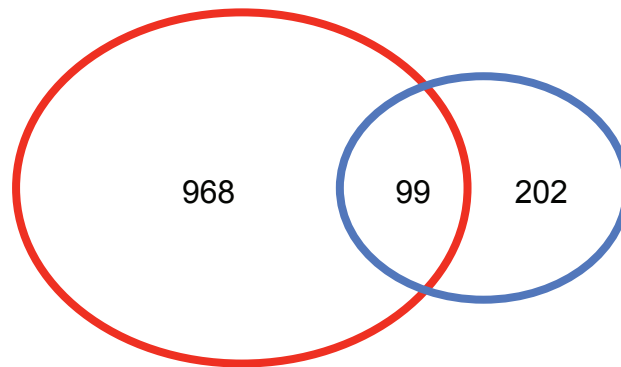

Comparison with Schwartz et al. (2010)
