# Supplementary figures and images for: Polycomb preferentially targets stalled promoters of coding and noncoding transcripts
Source: HighWire-hosted journal article supplement (doi:10.1101/gr.114348.110), 2010-12-22

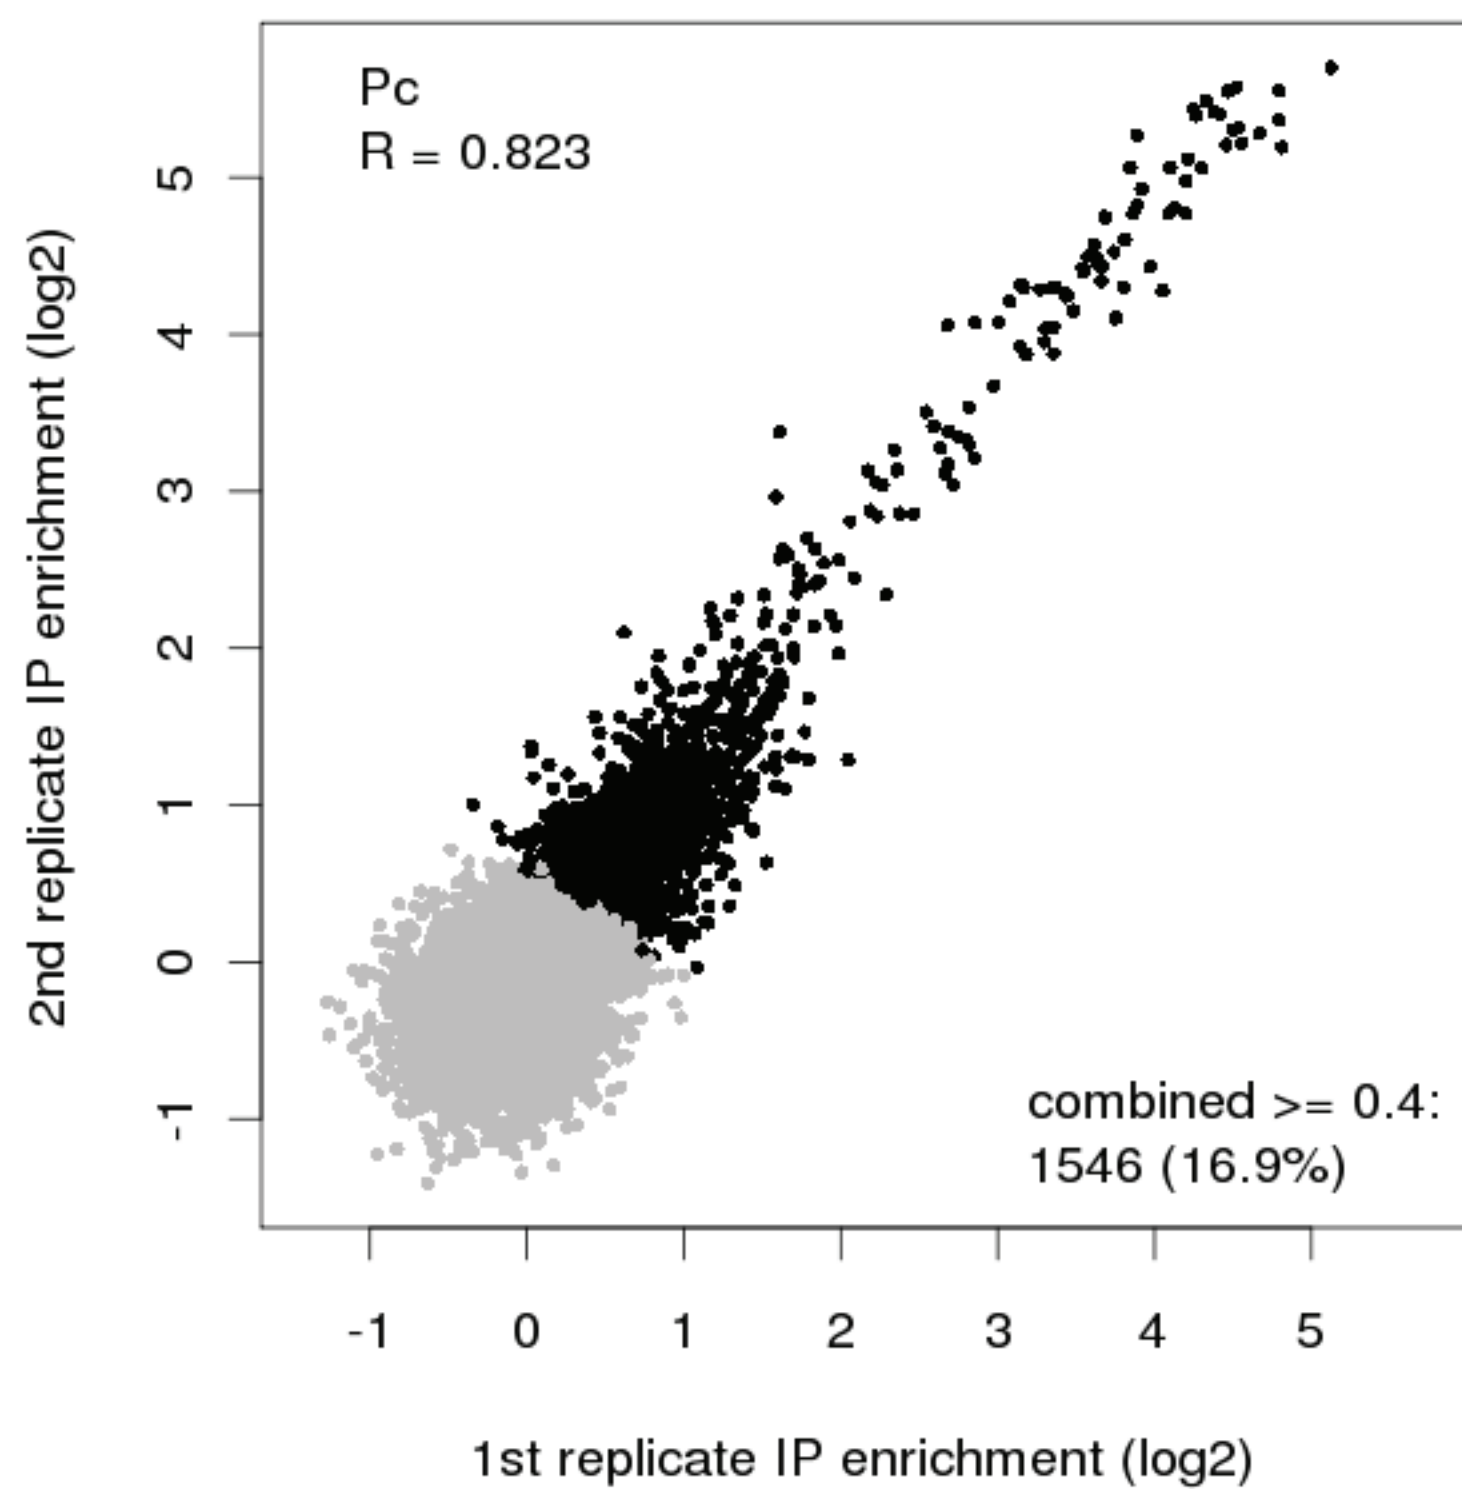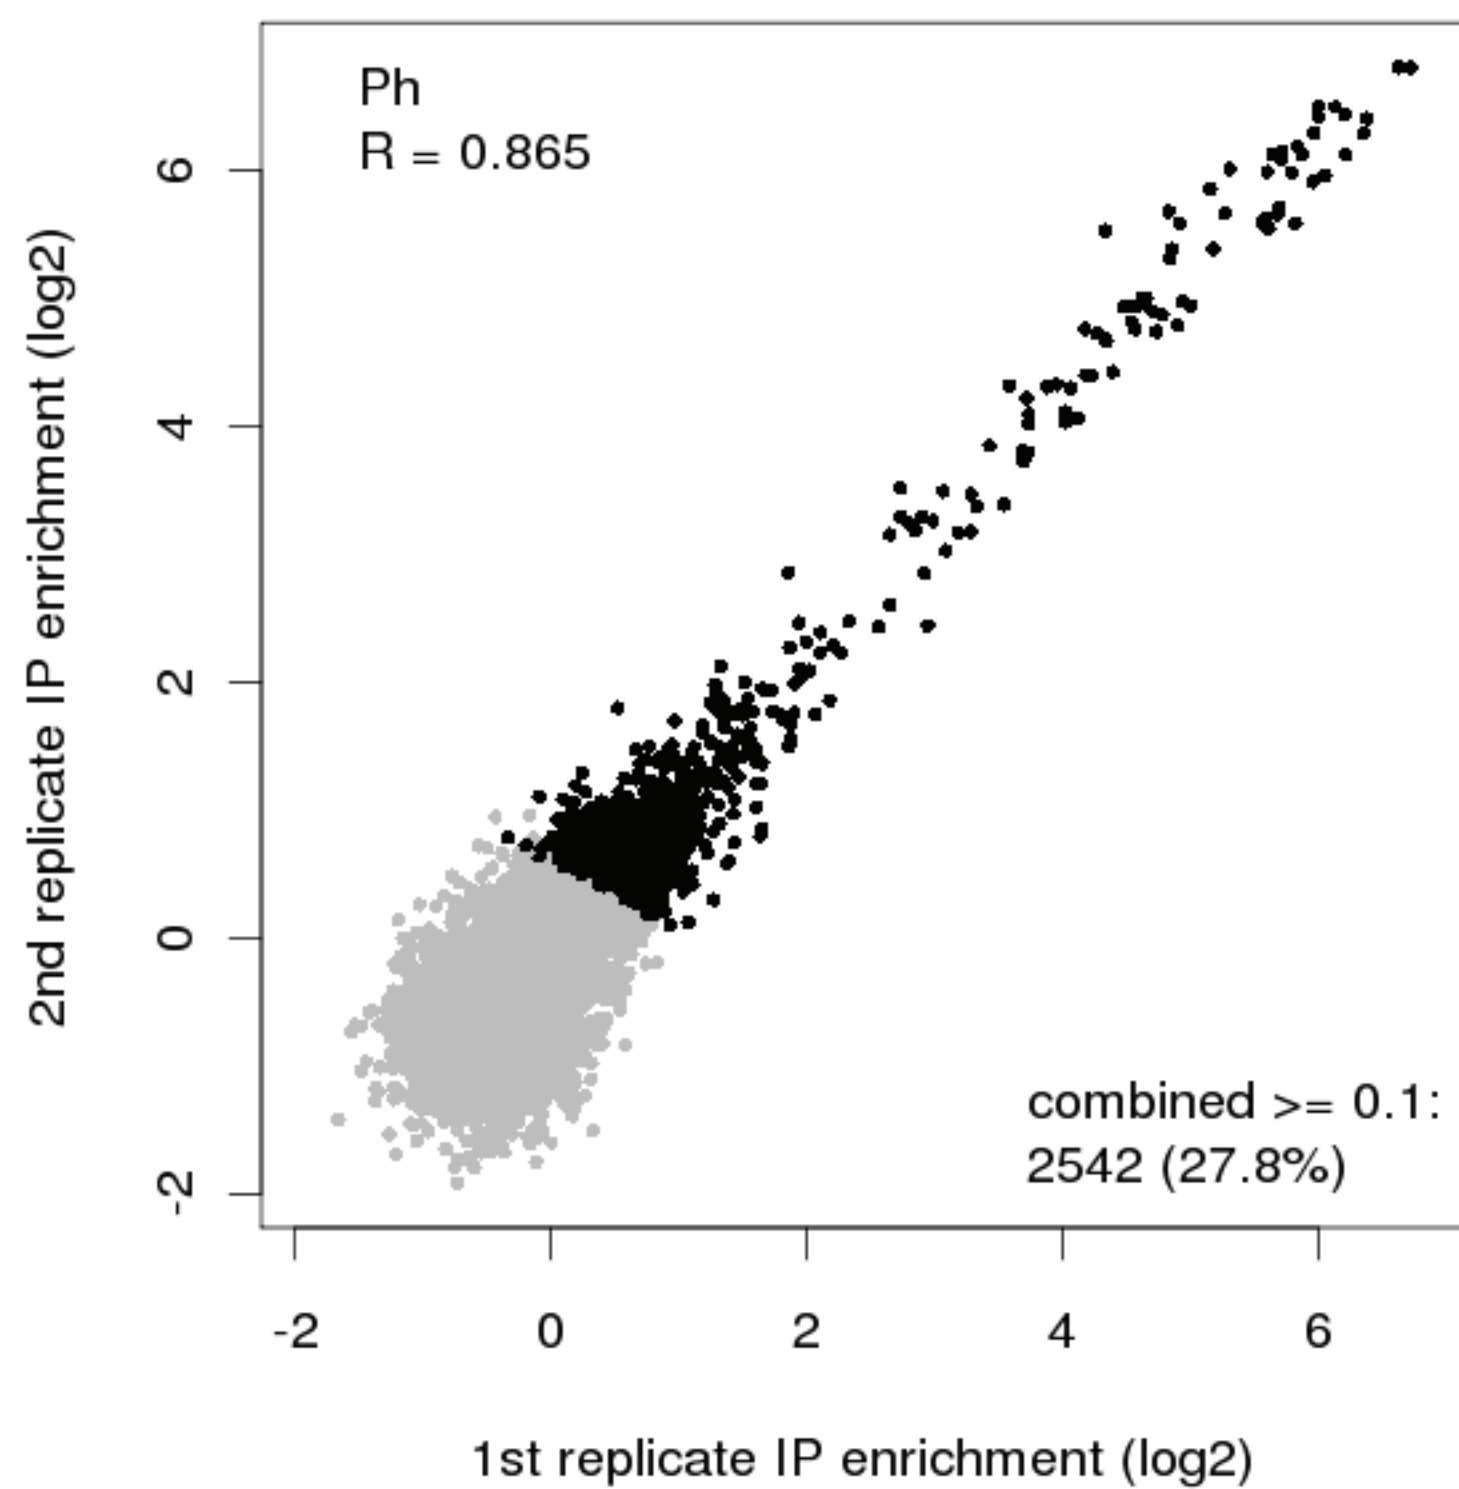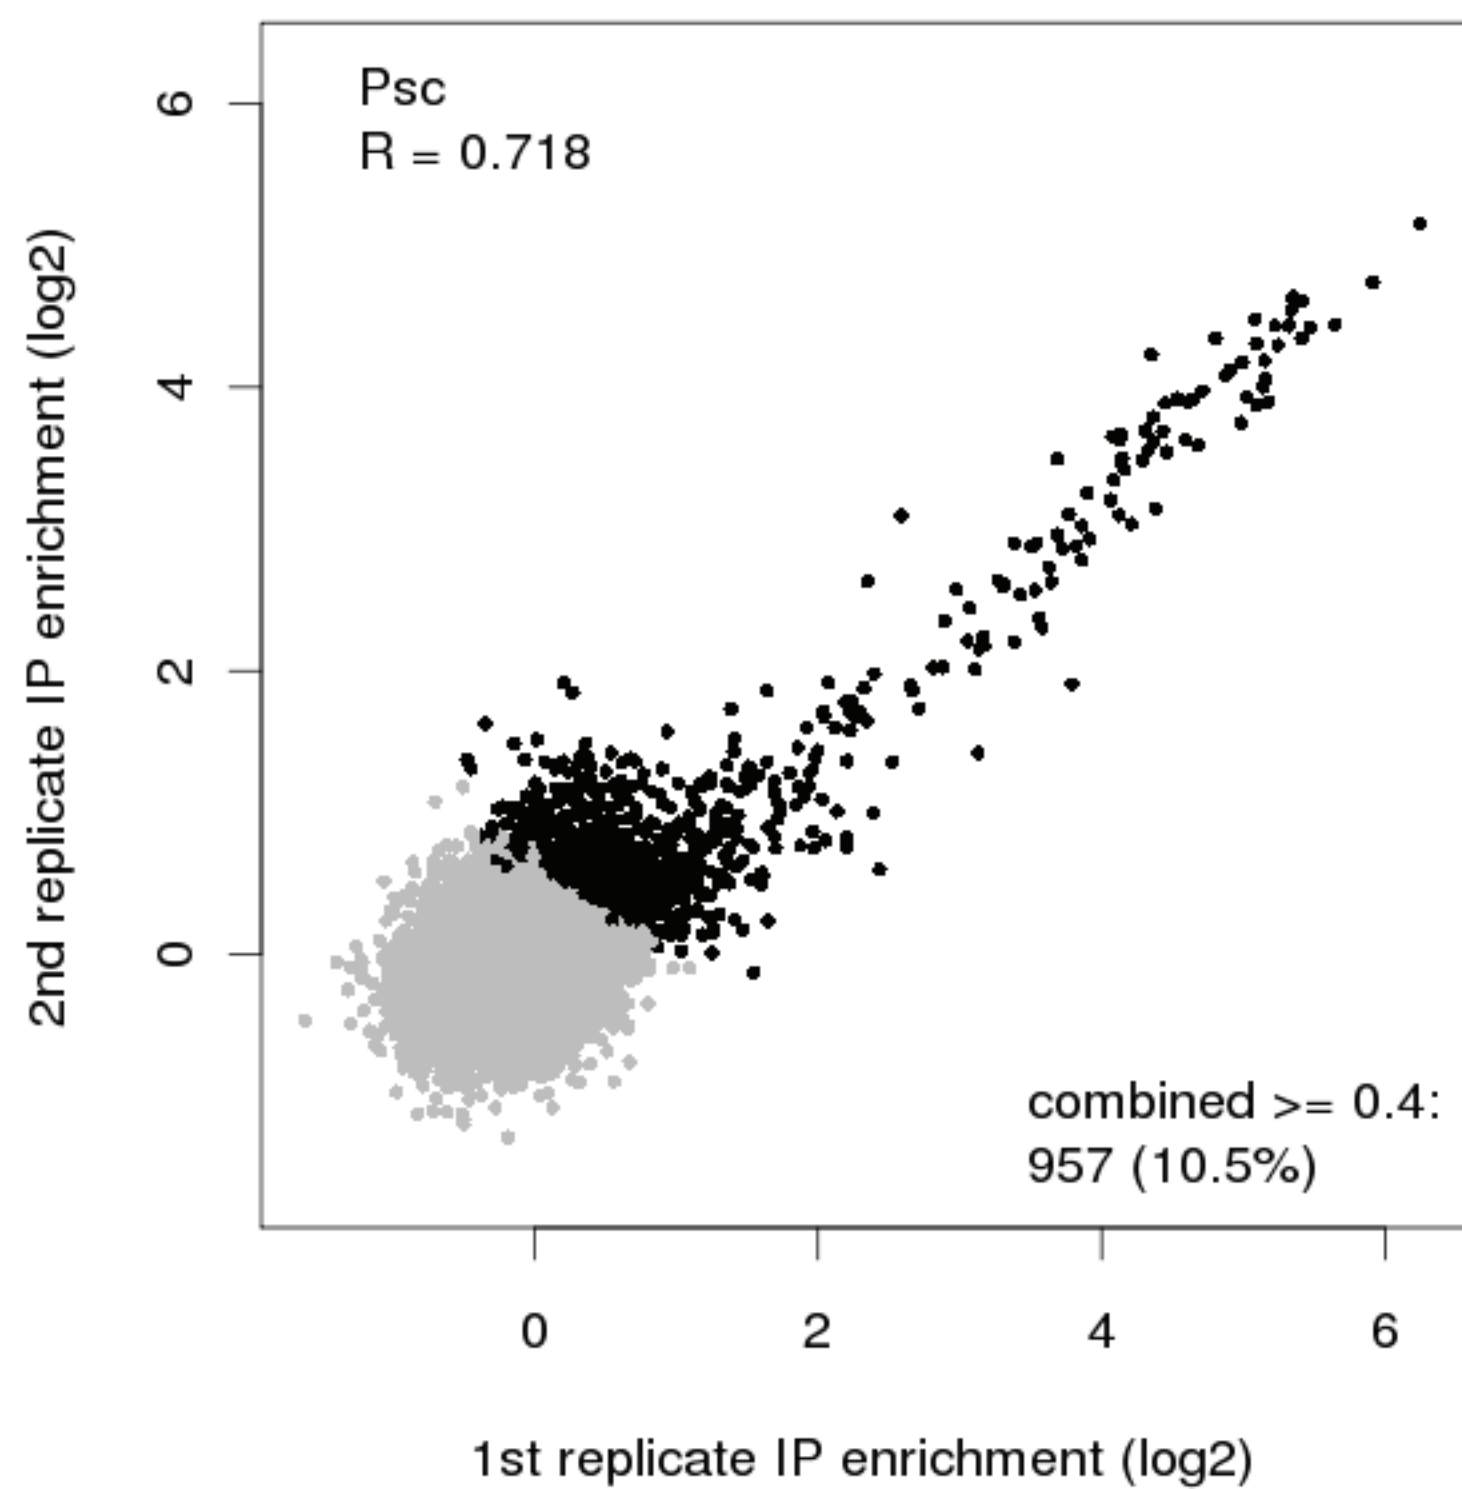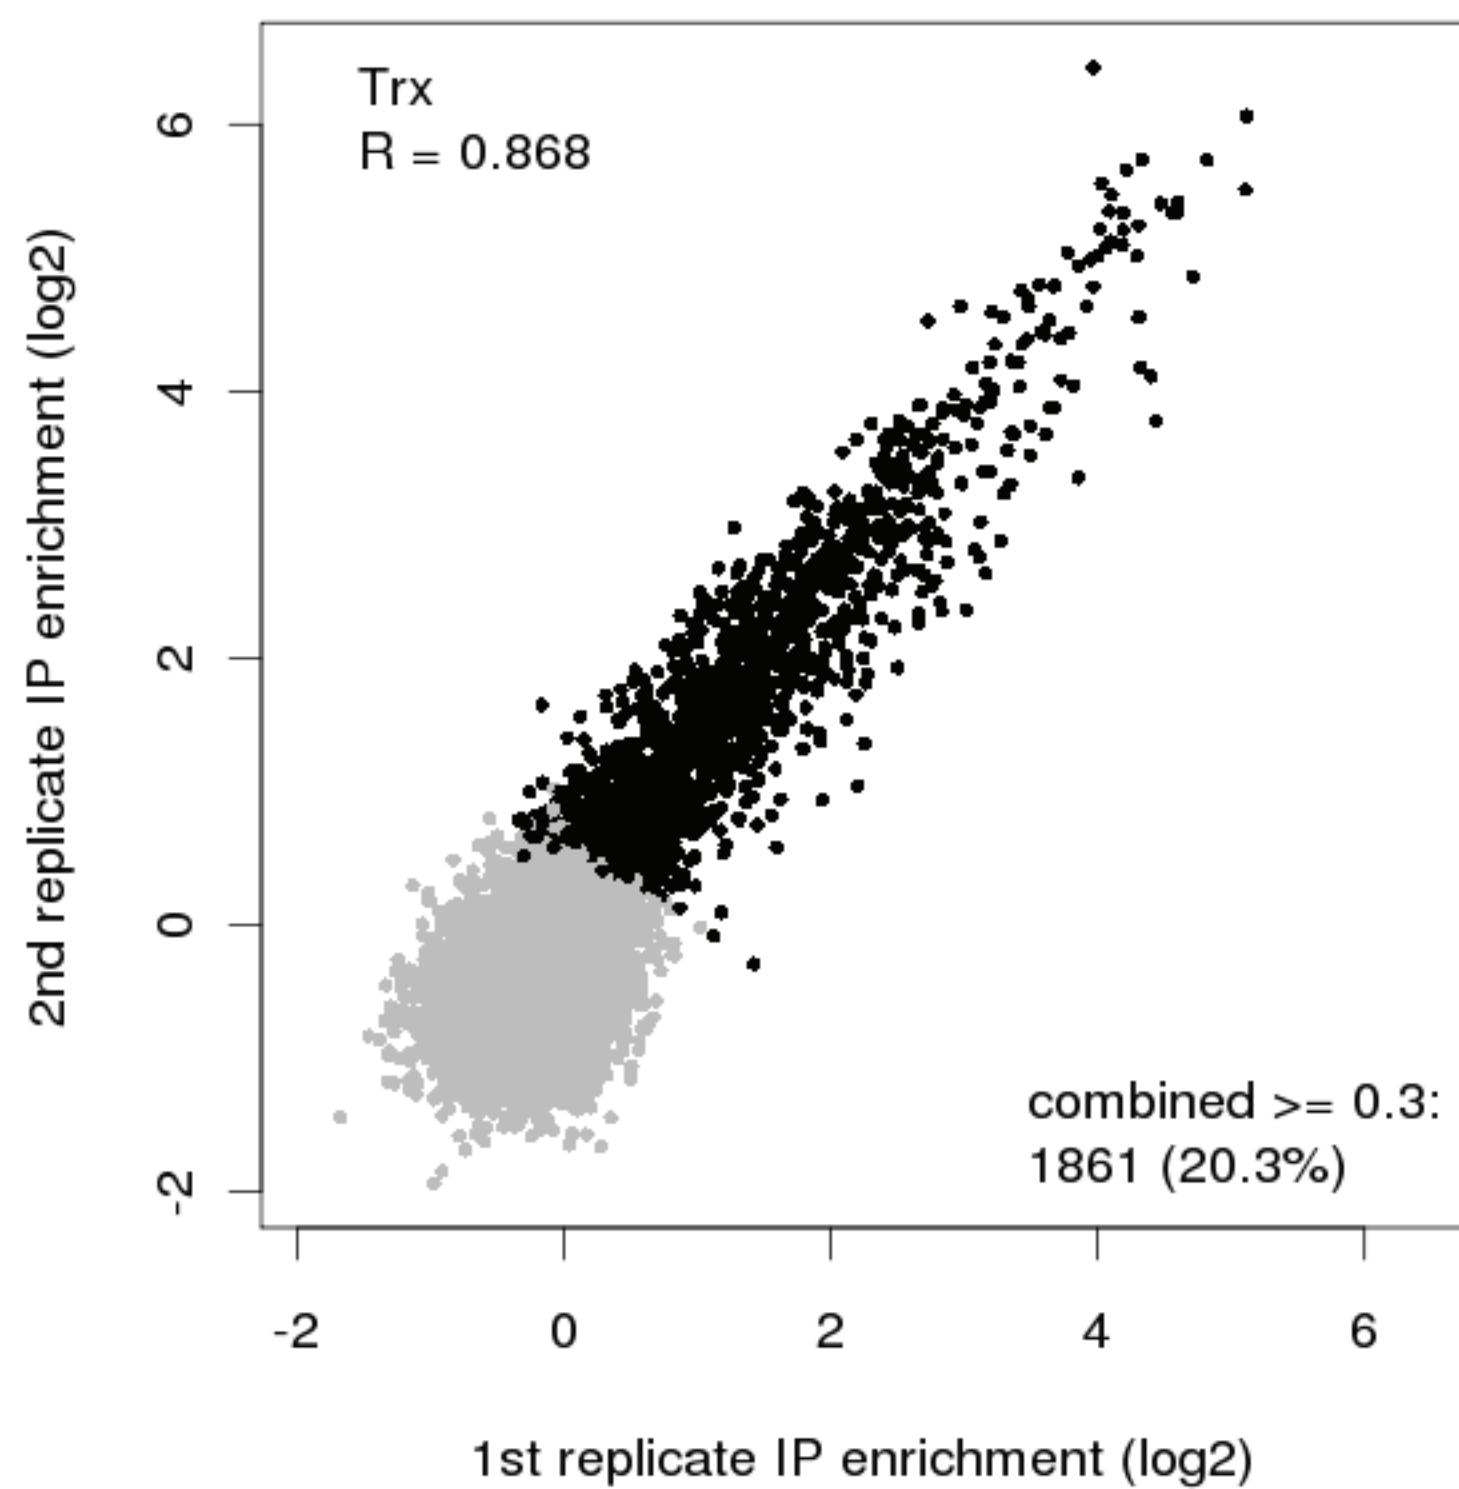

Supplement: Suppl_Figure_1.pdf [file Suppl_Figure_1.pdf]
